# Supplementary material
Source: PubMed Central journal article supplement (PMC2633816)
Supplement: pp.108.127183_2.pdf [file pp.108.127183_2.pdf]

Figure S2

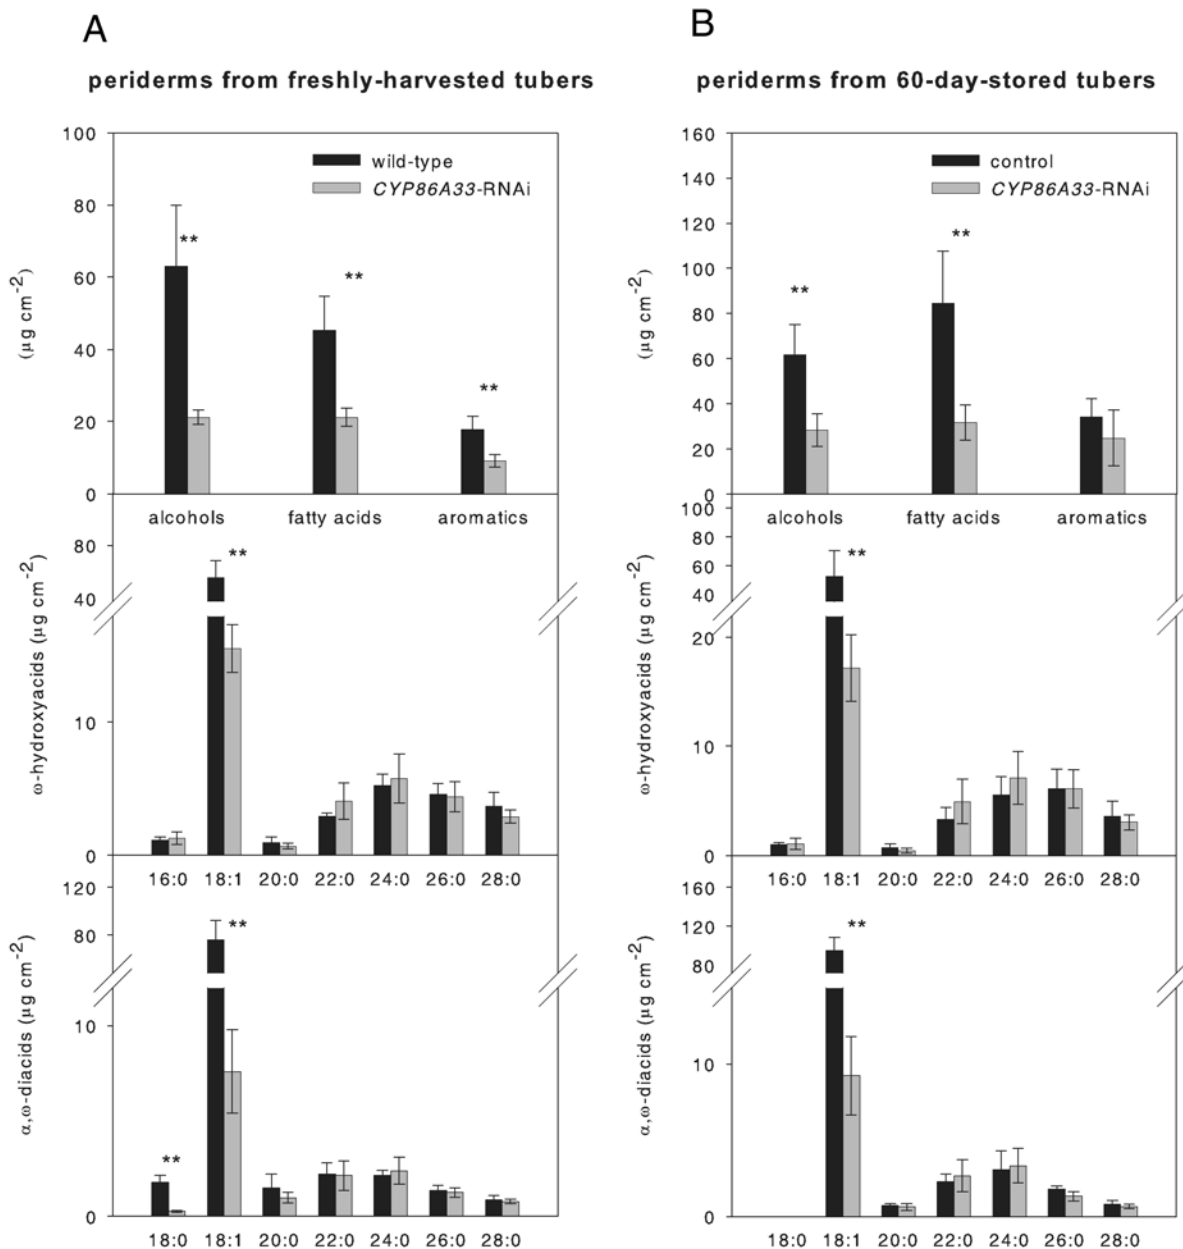

**Figure S2.** *CYP86A33*-RNAi aliphatic suberin chemical composition at different stages of tuber maturation.

**A.** Periderms from 0-day-stored (freshly-harvested) tubers, *CYP86A33*-RNAi, n=4; wild-type, n=5.

**B.** Periderms from 60-day-stored tubers, *CYP86A33*-RNAi, n=3; unsilenced or control lines, n=3.

Total amounts of primary alcohols, fatty acids and aromatic compounds and all identified  $\omega$ -hydroxyacid and  $\alpha,\omega$ -diacid monomers are shown. Asterisks denote a significant difference between *CYP86A33*-RNAi and wild-type periderm or control (t-Test; \*,  $P < 0.05$ ; \*\*,  $P < 0.01$ ). Data are represented as an average of three independent *CYP86A33*-RNAi lines. Data represent the mean  $\pm$  s.d.
