# Supplementary material
Source: PubMed Central journal article supplement (PMC2633816)
Supplement: pp.108.127183_4.pdf [file pp.108.127183_4.pdf]

Table S1

| Identifier          | Similarity to CYP86A33_RNAi fragment | EST identifier in TIGR microarray | Expression in tuber periderm <sup>1</sup>            | Best BlastX in <i>Arabidopsis</i> TAIR8 protein |            |                          |
|---------------------|--------------------------------------|-----------------------------------|------------------------------------------------------|-------------------------------------------------|------------|--------------------------|
|                     |                                      |                                   |                                                      | Gene                                            | Identifier | Similarity to potato EST |
| CYP86A33 (TC179730) | —                                    | STMIC57                           | high expression and induced at tuber onset           | CYP86A1                                         | At5g58860  | 86%                      |
| TC175254            | 64%                                  | STMIJ46 / STMJE27                 | high and constitutive expression during tuberization | CYP86A2                                         | At4g00360  | 83%                      |
| BQ514437            | 64%                                  | STMIL90                           | high expression and induced at tuber onset           | CYP96A9                                         | At4g39480  | 77%                      |
| BQ518886            | 56%                                  | STMJM56                           | lower expression                                     | CYP704A2                                        | At2g45510  | 84%                      |
| TC170902            | 56%                                  | STMHA12                           | lower expression                                     | CYP704A2                                        | At2g45510  | 80%                      |
| CK863597            | 57%                                  | —                                 | —                                                    | CYP704A2                                        | At2g45510  | 62%                      |
| CN212467            | 57%                                  | —                                 | —                                                    | CYP704A2                                        | At2g45510  | 72%                      |
| CV497926            | 58%                                  | —                                 | —                                                    | CYP704A2                                        | At2g45510  | 73%                      |
| CX161174            | 55%                                  | —                                 | —                                                    | oxygen-binding; similar to CYP704A2             | At1g69500  | 87%                      |
| TC192746            | 53%                                  | —                                 | —                                                    | CYP704A2                                        | At2g45510  | 70%                      |

<sup>1</sup> Data extracted from microarray experiments in TIGR Solanace Resource: expression in tuber skin (113\_Robin) and induction during tuberization (049\_Hannapel and 087\_Stupar)

**Table S1.** List of the potato ESTs most homologous to *CYP86A33*-RNAi fragment obtained by a BLASTN in the TIGR potato database. For each EST, TC/EST identifier and degree of similarity to *CYP86A33*-RNAi fragment are given. For those ESTs printed in TIGR potato microarray, the microarray identifier and its transcript accumulation levels in tuber periderm and gene induction during tuber onset are reported. Results of the best BlastX in *Arabidopsis* TAIR8 protein database are also given.
