# Supplementary material
Source: PubMed Central journal article supplement (PMC2633816)
Supplement: pp.108.127183_5.pdf [file pp.108.127183_5.pdf]

Table S2

| <i>Wax chemical composition</i> |                                     |                                                 |      |                                     |                                                 |      |
|---------------------------------|-------------------------------------|-------------------------------------------------|------|-------------------------------------|-------------------------------------------------|------|
| <i>Alkanes</i>                  | FRESHLY-HARVESTED TUBERS            |                                                 |      | 60 DAYS-STORED TUBERS               |                                                 |      |
|                                 | wild-type ( $\mu\text{g cm}^{-2}$ ) | <i>CYP86A33</i> -RNAi ( $\mu\text{g cm}^{-2}$ ) |      | wild-type ( $\mu\text{g cm}^{-2}$ ) | <i>CYP86A33</i> -RNAi ( $\mu\text{g cm}^{-2}$ ) |      |
| <i>C25</i>                      | 0,73 ± 0,14                         | 1,44 ± 0,52                                     | * ↑  | 1,26 ± 0,45                         | 1,30 ± 0,18                                     |      |
| <i>C26</i>                      | 0,03 ± 0,02                         | 0,06 ± 0,04                                     |      | 0,30 ± 0,20                         | 0,08 ± 0,05                                     |      |
| <i>C27</i>                      | 0,49 ± 0,10                         | 1,03 ± 0,09                                     | ** ↑ | 0,58 ± 0,16                         | 0,43 ± 0,11                                     |      |
| <i>Total</i>                    | 1,25 ± 0,23                         | 2,53 ± 0,53                                     | ** ↑ | 2,14 ± 0,73                         | 1,81 ± 0,30                                     |      |
| <i>Alcohols</i>                 |                                     |                                                 |      |                                     |                                                 |      |
| <i>C26</i>                      | 0,17 ± 0,07                         | 0,30 ± 0,04                                     | * ↑  | 0,31 ± 0,11                         | 0,39 ± 0,10                                     |      |
| <i>C28</i>                      | 2,13 ± 0,42                         | 1,71 ± 0,14                                     |      | 3,80 ± 0,40                         | 2,04 ± 0,41                                     | ** ↓ |
| <i>C30</i>                      | 0,34 ± 0,18                         | 0,29 ± 0,01                                     |      | 0,69 ± 0,21                         | 0,51 ± 0,12                                     |      |
| <i>Total</i>                    | 2,64 ± 0,44                         | 2,31 ± 0,12                                     |      | 4,79 ± 0,49                         | 2,94 ± 0,59                                     | ** ↓ |
| <i>Fatty acids</i>              |                                     |                                                 |      |                                     |                                                 |      |
| <i>C22:0</i>                    | 0,07 ± 0,04                         | 0,11 ± 0,02                                     |      | 0,34 ± 0,30                         | 0,51 ± 0,14                                     |      |
| <i>C24:0</i>                    | 0,06 ± 0,03                         | 0,21 ± 0,02                                     | ** ↑ | 0,16 ± 0,06                         | 0,36 ± 0,05                                     | ** ↑ |
| <i>C26:0</i>                    | 0,05 ± 0,03                         | 0,35 ± 0,02                                     | ** ↑ | 0,24 ± 0,12                         | 0,57 ± 0,06                                     | ** ↑ |
| <i>C28:0</i>                    | 0,15 ± 0,07                         | 0,96 ± 0,33                                     | ** ↑ | 1,24 ± 0,92                         | 2,51 ± 0,33                                     |      |
| <i>C30:0</i>                    | 0,13 ± 0,07                         | 0,61 ± 0,18                                     | ** ↑ | 0,54 ± 0,22                         | 0,86 ± 0,65                                     |      |
| <i>Total</i>                    | 0,46 ± 0,18                         | 2,25 ± 0,47                                     | ** ↑ | 2,52 ± 1,26                         | 4,81 ± 1,04                                     |      |
| <i>Ferulic acid esters</i>      |                                     |                                                 |      |                                     |                                                 |      |
| <i>C18</i>                      | 0,18 ± 0,04                         | 0,29 ± 0,07                                     | * ↑  | 0,41 ± 0,16                         | 0,72 ± 0,18                                     |      |
| <i>C20</i>                      | 0,09 ± 0,02                         | 0,20 ± 0,06                                     | ** ↑ | 0,20 ± 0,08                         | 0,68 ± 0,25                                     | * ↑  |
| <i>C21</i>                      | 0,18 ± 0,03                         | 1,31 ± 0,58                                     | ** ↑ | 0,41 ± 0,21                         | 0,79 ± 0,17                                     | * ↑  |
| <i>C22</i>                      | 0,06 ± 0,02                         | 0,33 ± 0,14                                     | ** ↑ | 0,11 ± 0,02                         | 0,35 ± 0,13                                     | * ↑  |
| <i>C23</i>                      | 0,23 ± 0,05                         | 2,27 ± 0,44                                     | ** ↑ | 0,60 ± 0,12                         | 2,51 ± 1,10                                     | * ↑  |
| <i>C24</i>                      | 0,12 ± 0,05                         | 0,71 ± 0,20                                     | ** ↑ | 0,22 ± 0,05                         | 1,16 ± 0,50                                     | * ↑  |
| <i>C25</i>                      | 0,07 ± 0,02                         | 0,28 ± 0,03                                     | ** ↑ | 0,19 ± 0,03                         | 0,27 ± 0,07                                     |      |
| <i>C26</i>                      | 0,21 ± 0,08                         | 0,76 ± 0,17                                     | ** ↑ | 0,44 ± 0,23                         | 0,86 ± 0,26                                     |      |
| <i>C27</i>                      | 0,06 ± 0,02                         | 0,11 ± 0,03                                     | * ↑  | 0,15 ± 0,09                         | 0,10 ± 0,03                                     |      |
| <i>C28</i>                      | 0,80 ± 0,25                         | 1,66 ± 0,12                                     | ** ↑ | 2,05 ± 1,17                         | 1,63 ± 0,34                                     |      |
| <i>C29</i>                      | 0,31 ± 0,19                         | 0,74 ± 0,20                                     | * ↑  | 0,64 ± 0,28                         | 0,28 ± 0,08                                     |      |
| <i>C30</i>                      | 1,49 ± 0,37                         | 3,77 ± 0,30                                     | ** ↑ | 3,06 ± 0,56                         | 3,87 ± 0,77                                     |      |
| <i>C31</i>                      | 0,16 ± 0,08                         | 0,45 ± 0,06                                     | * ↑  | 0,32 ± 0,18                         | 0,34 ± 0,14                                     |      |
| <i>Total</i>                    | 3,98 ± 1,06                         | 12,89 ± 1,72                                    | ** ↑ | 8,78 ± 2,17                         | 13,55 ± 3,37                                    |      |
| <i>Total waxes</i>              | 8,33 ± 1,10                         | 19,98 ± 1,86                                    | ** ↑ | 18,24 ± 0,62                        | 23,11 ± 3,97                                    |      |

**Table S2.** Wax chemical composition of *CYP86A33*-RNAi periderm at different stages of tuber maturation. *CYP86A33*-RNAi wax monomeric content ( $\mu\text{g cm}^{-2}$ ) of 0-day-stored (freshly-harvested; n=5) compared to the wild-type (n=3) and 60-day-stored (n=3) tubers compared to unsilenced or control periderms (n=3). The soluble aliphatic fraction was obtained by treating the enzymatically isolated periderm with a 1 to 1 of chloroform to methanol mixture. Absolute amounts of released compounds and total amounts of each substance class are given. Three independent RNAi lines were used. Asterisks denote a significant difference in *CYP86A33*-RNAi with wild-type or control (t-Test; \*,  $P < 0.05$ ; \*\*,  $P < 0.01$ ). Data represent the mean  $\pm$  s.d.
