# Supplementary material
Source: PubMed Central journal article supplement (PMC2633816)
Supplement: pp.108.127183_6.pdf [file pp.108.127183_6.pdf]

Figure S3

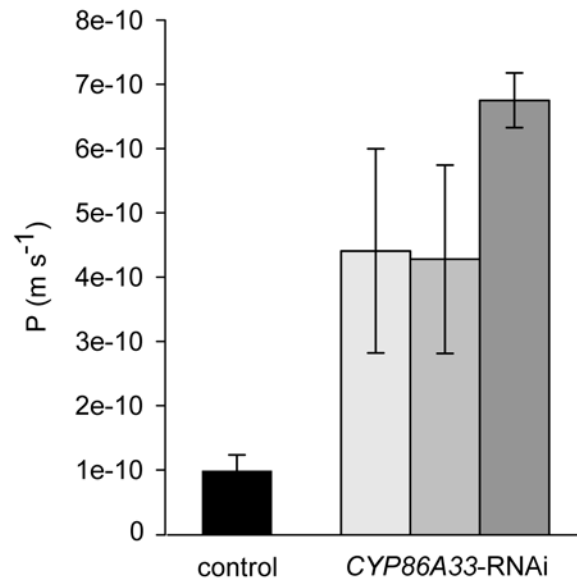

**Figure S3.** Water permeances of isolated periderms of *CYP86A33*-RNAi and unsilenced or control periderms from 60-day-stored tubers.

*CYP86A33* silencing impairs periderm barrier properties and increases water permeance ( $P$ ;  $\text{m s}^{-1}$ ) in periderms from three independent *CYP86A33*-RNAi lines ( $n=4$ ,  $n=5$  and  $n=5$ ) compared to unsilenced or control lines ( $n=5$ ). Data represent the mean  $\pm$  s.d.
